# Supplementary material for: Root Parameters Show How Management Alters Resource Distribution and Soil Quality in Conventional and Low-Input Cropping Systems in Central Iowa
Source: PLoS One. 2016 Oct 28;11(10):e0164209. doi: 10.1371/journal.pone.0164209 (PMC5085082; doi:10.1371/journal.pone.0164209)
Supplement: S2 Table — (XLSX) [file pone.0164209.s004.xlsx]

## Sheet: S2
S2 Table. Soil property means for soils collected in Spring, Summer and Fall of 2009 for all crop phases.
	POM-C		PMN		FDA		BD		WFPS		WSA
	mg cm-3		mg cm-3		mg cm-3 min-1		g cm-3		%		%
Spring	2.21836	aa*	37.2767	a	0.87504	a	1.1294	a	48.8443	a	52.4723	b
Summer	2.10053	a	36.2632	a	0.81897	a	1.0185	b	33.0166	b	58.3309	a
Fall	1.99399	a*	38.8688	a	0.84846	a	1.0942	a	46.7408	ab	42.39	c
Corn	2.04873	a	36.1219	a	0.826787	a	1.07097	a	42.5933	a	50.7082	a
Soybean	2.07747	a	35.0069	a*	0.826787	a	1.0659	a	43.2716	a	50.6501	a
Oat/legume	2.26347	a	42.8452	a*	0.889405	a	1.09145	a	43.6696	a	51.9503	a
Alfalfa	2.06864	a	39.2586	a	0.79785	a	1.1328	a	40.871	a	51.5388	a
POM-C, particulate organic matter C; PMN, potentially mineralizable N; FDA, enzymatic activity; BD, bulk density; WFPS, water-filled pore space; WSA, percentage of water-stable macro-aggregates
aDifferent lowercase letters represent significant differences between the systems at p<0.05, taking into account experimentwise error. Differences are obtained by contrast statements comparing means of all crops within the rotations.
*Asterisks between the same letter represent significant differences at p<0.10
